# Supplementary material for: Short- and Long-Term Effects of Suboptimal Selenium Intake and Developmental Lead Exposure on Behavior and Hippocampal Glutamate Receptors in a Rat Model
Source: Nutrients. 2022 Aug 10;14(16):3269. doi: 10.3390/nu14163269 (PMC9416673; doi:10.3390/nu14163269)
Supplement: Supplementary file 1 [file nutrients-14-03269-s001.zip]

Archive with 6 entries (6 files):
- Supplementary Figure 1.pdf
- Supplementary Figure 2.pdf
- Supplementary Figure 3.pdf
- Supplementary Figure 4.pdf
- Supplementary Figure Legends.pdf
- Supplementary Material.pdf
