# Supplementary figures and images for: Short- and Long-Term Effects of Suboptimal Selenium Intake and Developmental Lead Exposure on Behavior and Hippocampal Glutamate Receptors in a Rat Model
Source: MDPI journal article supplement (doi:10.3390/nu14163269), 2022-08-10

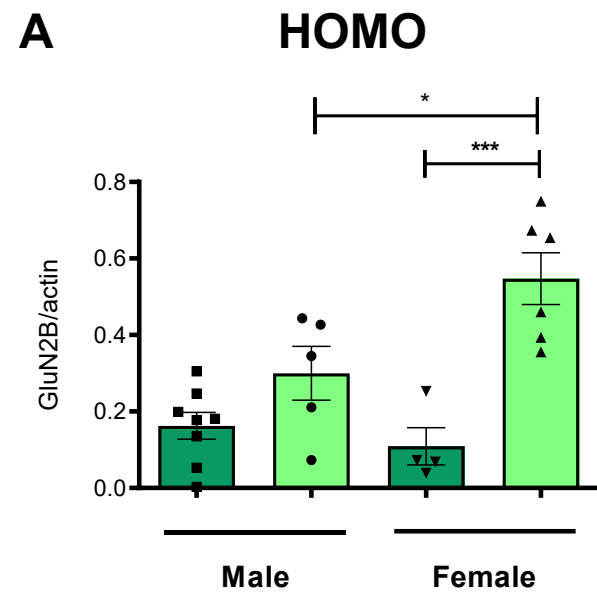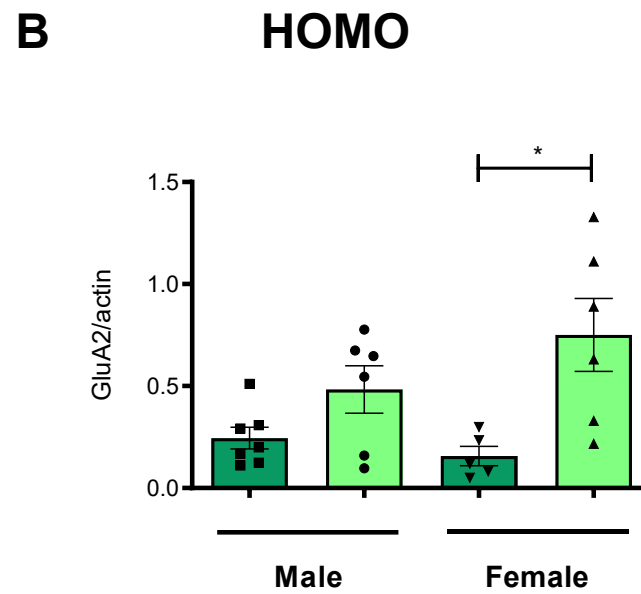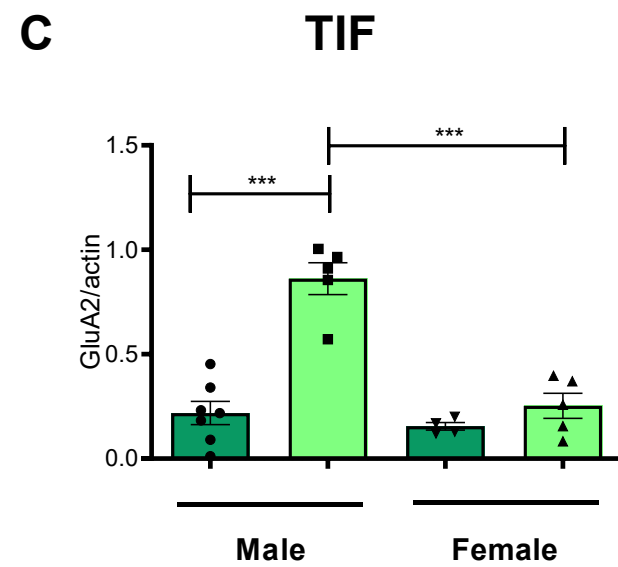

Se Opt/Veh  
Se Subopt/Veh

Supplement: s1 [file s1]

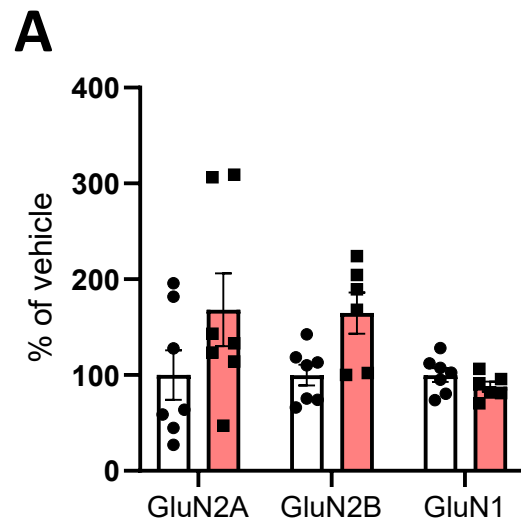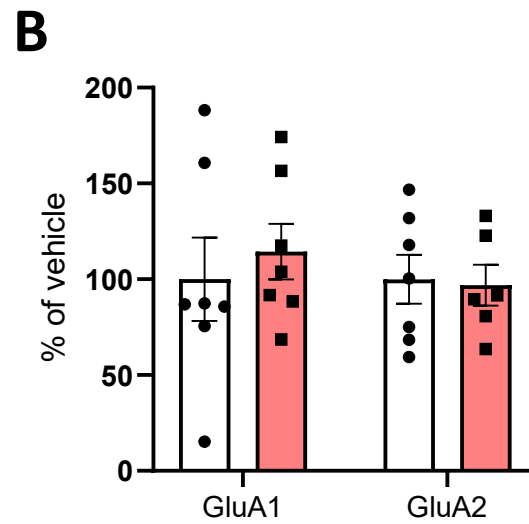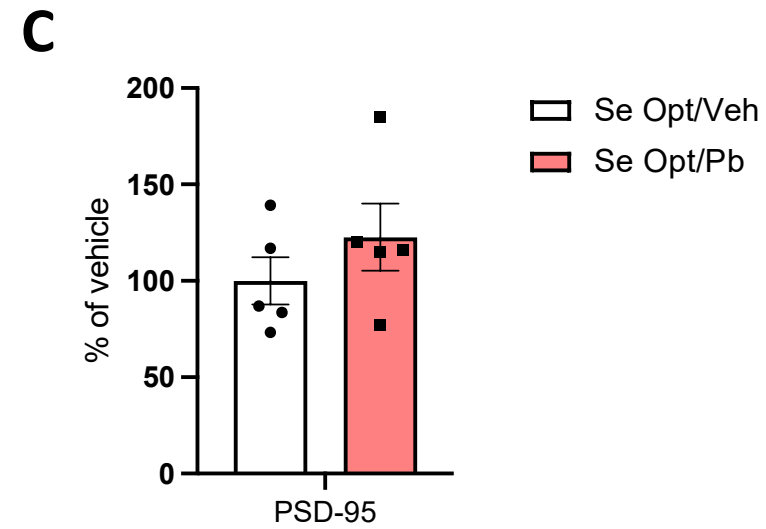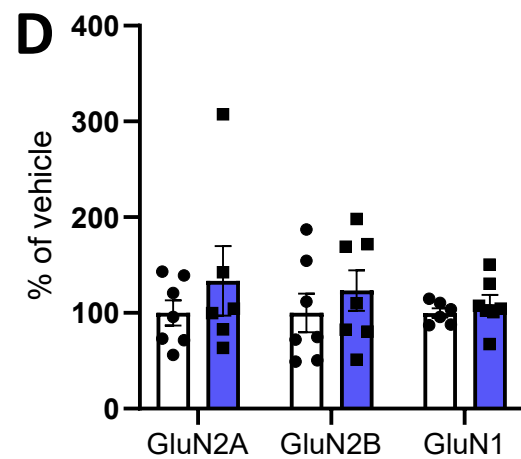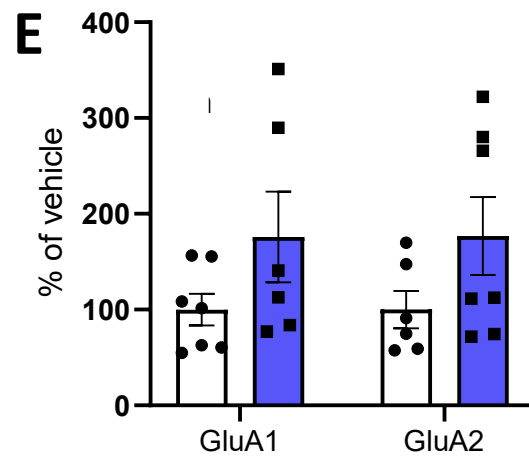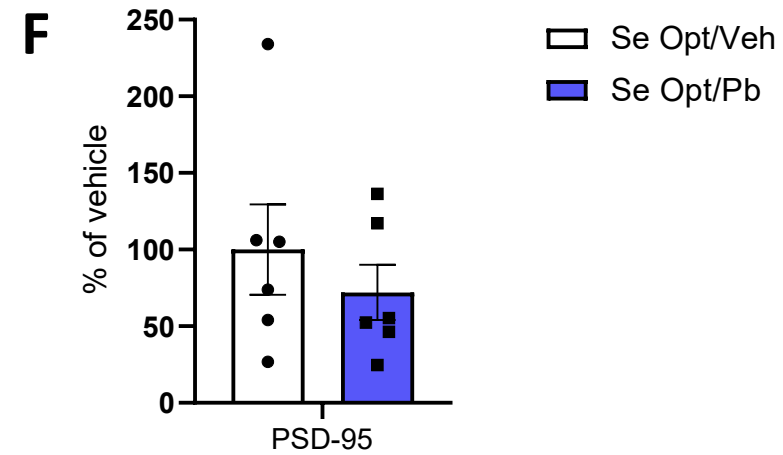

Supplement: s1 [file s1]

**A**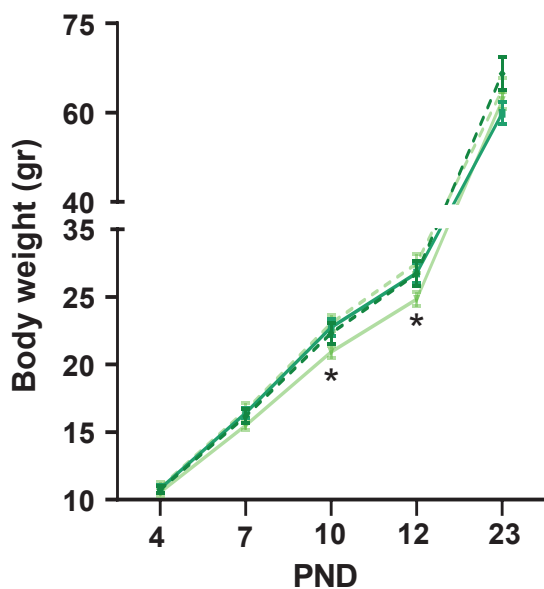**B**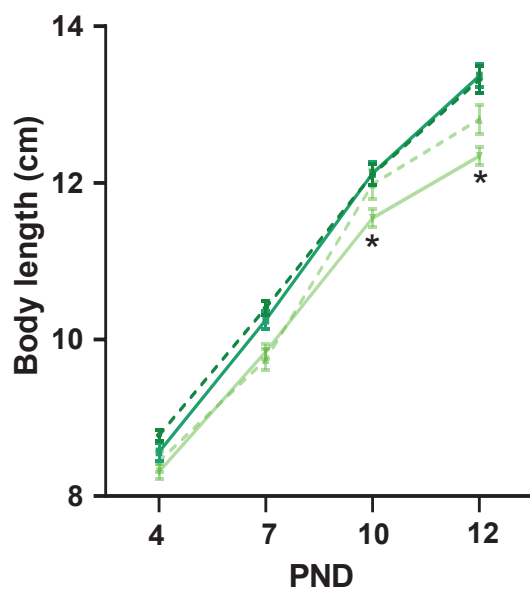

Se Opt/Veh Se Opt/Pb Se Subopt/Veh Se Subopt/Pb

**C**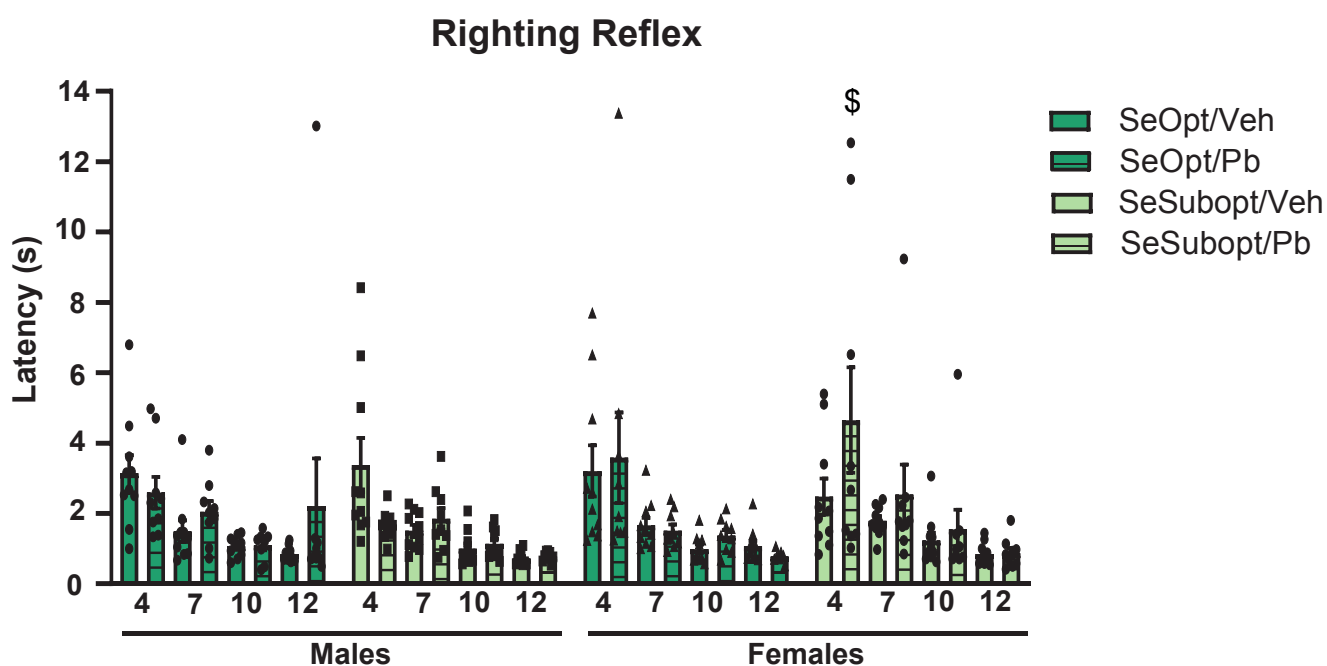**D**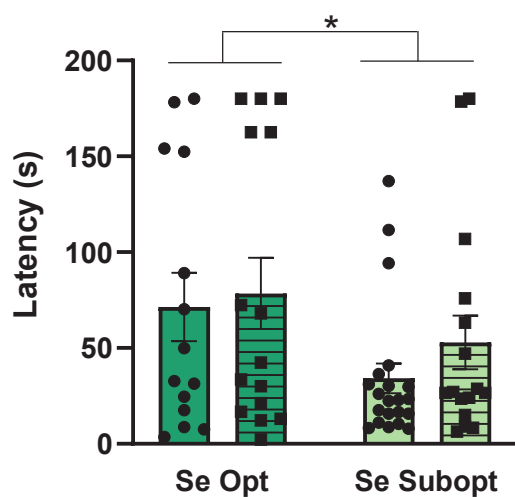**E**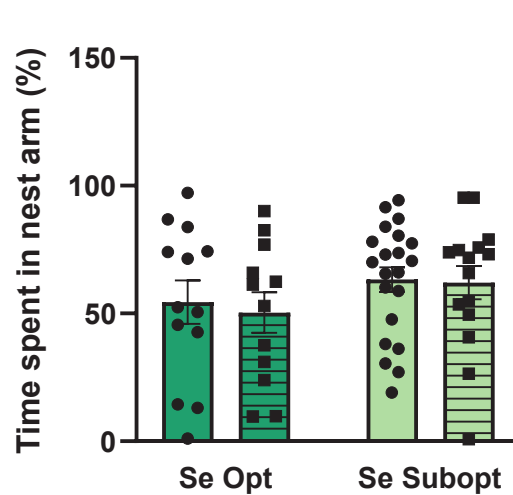

Supplement: s1 [file s1]

**A**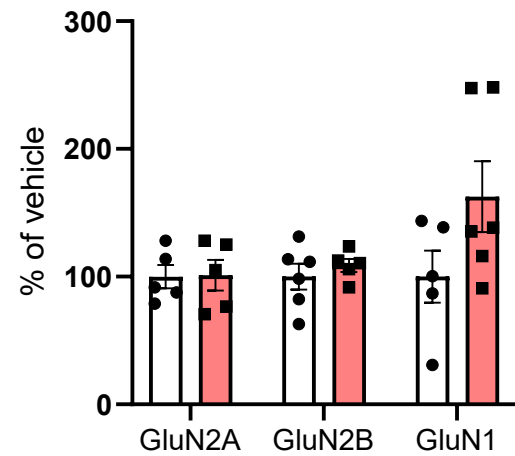**B**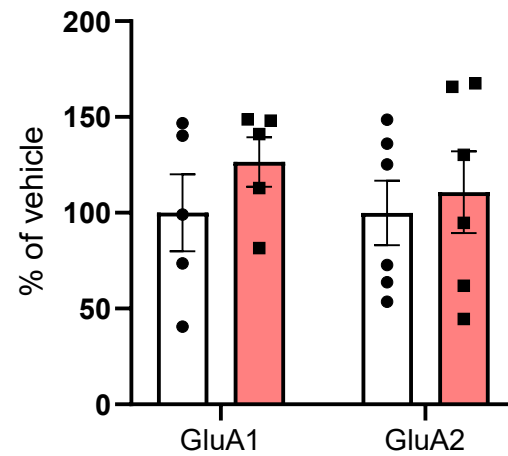**C**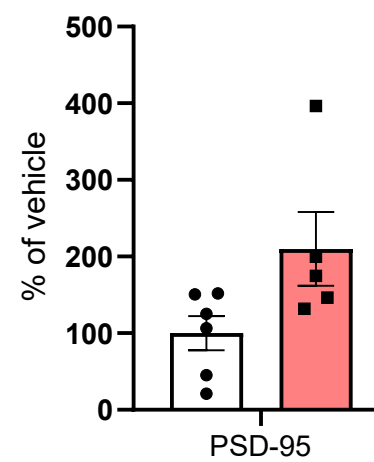**D**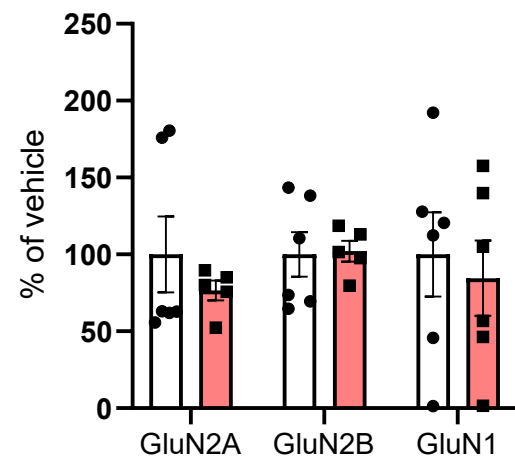**E**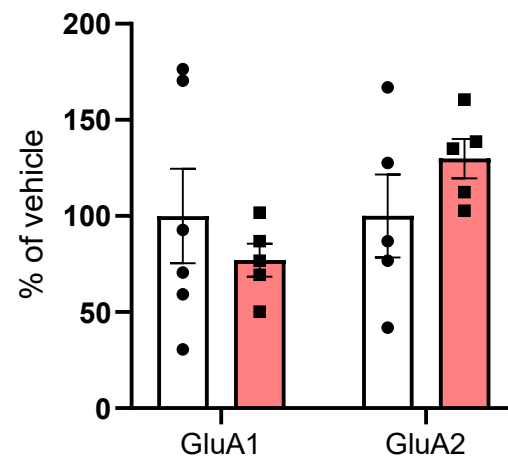

□ Se Subopt/Veh  
■ Se Subopt/Pb

Supplement: s1 [file s1]
